# Supplementary material for: Factors associated with in-hospital mortality of adult tetanus patients–a multicenter study from Bangladesh
Source: PubMed Central journal article supplement (PMC8887756; doi:10.1371/journal.pntd.0010235), 2022-03-01

# PLOS Neglected Tropical Diseases

## Factors Associated with In-Hospital Mortality of Adult Tetanus Patients– A Multicenter Study from Bangladesh --Manuscript Draft--

|                                                                                                                                                                                                                                                                                                                                                                                                                                                                                                      |                                                                                                                                                                                                                                                                                                                                                                                                                                                                                                                                                                                                                                                                                                                                                                                                                                                                                                                                                                                                                                                                                                                                                                                                                                                                                                                                                                                                                                                                                                                                                                                                                                                                                                                                                                                                                                                                                          |
|------------------------------------------------------------------------------------------------------------------------------------------------------------------------------------------------------------------------------------------------------------------------------------------------------------------------------------------------------------------------------------------------------------------------------------------------------------------------------------------------------|------------------------------------------------------------------------------------------------------------------------------------------------------------------------------------------------------------------------------------------------------------------------------------------------------------------------------------------------------------------------------------------------------------------------------------------------------------------------------------------------------------------------------------------------------------------------------------------------------------------------------------------------------------------------------------------------------------------------------------------------------------------------------------------------------------------------------------------------------------------------------------------------------------------------------------------------------------------------------------------------------------------------------------------------------------------------------------------------------------------------------------------------------------------------------------------------------------------------------------------------------------------------------------------------------------------------------------------------------------------------------------------------------------------------------------------------------------------------------------------------------------------------------------------------------------------------------------------------------------------------------------------------------------------------------------------------------------------------------------------------------------------------------------------------------------------------------------------------------------------------------------------|
| <b>Manuscript Number:</b>                                                                                                                                                                                                                                                                                                                                                                                                                                                                            | PNTD-D-21-01768                                                                                                                                                                                                                                                                                                                                                                                                                                                                                                                                                                                                                                                                                                                                                                                                                                                                                                                                                                                                                                                                                                                                                                                                                                                                                                                                                                                                                                                                                                                                                                                                                                                                                                                                                                                                                                                                          |
| <b>Full Title:</b>                                                                                                                                                                                                                                                                                                                                                                                                                                                                                   | Factors Associated with In-Hospital Mortality of Adult Tetanus Patients– A Multicenter Study from Bangladesh                                                                                                                                                                                                                                                                                                                                                                                                                                                                                                                                                                                                                                                                                                                                                                                                                                                                                                                                                                                                                                                                                                                                                                                                                                                                                                                                                                                                                                                                                                                                                                                                                                                                                                                                                                             |
| <b>Short Title:</b>                                                                                                                                                                                                                                                                                                                                                                                                                                                                                  | Factors Associated with Mortality of Adult Tetanus Patients                                                                                                                                                                                                                                                                                                                                                                                                                                                                                                                                                                                                                                                                                                                                                                                                                                                                                                                                                                                                                                                                                                                                                                                                                                                                                                                                                                                                                                                                                                                                                                                                                                                                                                                                                                                                                              |
| <b>Article Type:</b>                                                                                                                                                                                                                                                                                                                                                                                                                                                                                 | Research Article                                                                                                                                                                                                                                                                                                                                                                                                                                                                                                                                                                                                                                                                                                                                                                                                                                                                                                                                                                                                                                                                                                                                                                                                                                                                                                                                                                                                                                                                                                                                                                                                                                                                                                                                                                                                                                                                         |
| <b>Keywords:</b>                                                                                                                                                                                                                                                                                                                                                                                                                                                                                     | Tetanus; In-hospital mortality; Fatality; Risk factors                                                                                                                                                                                                                                                                                                                                                                                                                                                                                                                                                                                                                                                                                                                                                                                                                                                                                                                                                                                                                                                                                                                                                                                                                                                                                                                                                                                                                                                                                                                                                                                                                                                                                                                                                                                                                                   |
| <b>Abstract:</b>                                                                                                                                                                                                                                                                                                                                                                                                                                                                                     | <p><b>Background:</b> Tetanus, a vaccine-preventable disease, is still occurring in the elderly population of low- and middle-income countries with a high case-fatality rate. The objective of the study was to elucidate the factors associated with in-hospital mortality of tetanus in Bangladesh.</p> <p><b>Methods:</b> This prospective observational study, conducted in two specialized infectious disease hospitals, conveniently selected adult tetanus patients (≥18 years) for inclusion. Data were collected through a preformed structured questionnaire. Kaplan Meier survival analysis and univariate and multivariable Cox regression analysis were carried out to assess factors associated with in-hospital mortality among patients. All analysis was done using Stata (version 16) and SPSS (version 26).</p> <p><b>Results:</b> A total of 61 confirmed tetanus cases were included, and the overall in-hospital mortality rate was 34.4% (n=21). Patients had an average age of 46.49 ±15.65 years (SD), and the majority were male (96.7%), farmers (57.4%), and came from rural areas (93.4%). Survival analysis revealed that the probability of death was significantly higher among patients having an age of &lt; 40 years, incubation time of ≤12 days, onset time of ≤ 4 days, and having complication(s). However, on multivariable Cox regression analysis, age (adjusted hazard ratio [aHR] 4.03, 95% Confidence Interval [CI] 1.07 – 15.17, p=0.039) and onset time (≤4 days) (aHR 3.33; 95% CI 1.05 – 10.57, p=0.041) came as significant predictors of in-hospital mortality after adjusting for incubation period and complications.</p> <p><b>Conclusion:</b> Older age and short onset time are the two most important determinants of in-hospital mortality of tetanus patients. Hence, these patients require enhanced emphasis and care.</p> |
| <b>Additional Information:</b>                                                                                                                                                                                                                                                                                                                                                                                                                                                                       |                                                                                                                                                                                                                                                                                                                                                                                                                                                                                                                                                                                                                                                                                                                                                                                                                                                                                                                                                                                                                                                                                                                                                                                                                                                                                                                                                                                                                                                                                                                                                                                                                                                                                                                                                                                                                                                                                          |
| <b>Question</b>                                                                                                                                                                                                                                                                                                                                                                                                                                                                                      | <b>Response</b>                                                                                                                                                                                                                                                                                                                                                                                                                                                                                                                                                                                                                                                                                                                                                                                                                                                                                                                                                                                                                                                                                                                                                                                                                                                                                                                                                                                                                                                                                                                                                                                                                                                                                                                                                                                                                                                                          |
| <p><b>Financial Disclosure</b></p> <p>Enter a financial disclosure statement that describes the sources of funding for the work included in this submission. Review the <a href="#">submission guidelines</a> for detailed requirements. View published research articles from <a href="#">PLOS NTDs</a> for specific examples.</p> <p>This statement is required for submission and <b>will appear in the published article</b> if the submission is accepted. Please make sure it is accurate.</p> | <p>The funders had no role in study design, data collection and analysis, decision to publish, or preparation of the manuscript.</p>                                                                                                                                                                                                                                                                                                                                                                                                                                                                                                                                                                                                                                                                                                                                                                                                                                                                                                                                                                                                                                                                                                                                                                                                                                                                                                                                                                                                                                                                                                                                                                                                                                                                                                                                                     |

### Unfunded studies

Enter: *The author(s) received no specific funding for this work.*

### Funded studies

Enter a statement with the following details:

- Initials of the authors who received each award
- Grant numbers awarded to each author
- The full name of each funder
- URL of each funder website
- Did the sponsors or funders play any role in the study design, data collection and analysis, decision to publish, or preparation of the manuscript?
- **NO** - Include this sentence at the end of your statement: *The funders had no role in study design, data collection and analysis, decision to publish, or preparation of the manuscript.*
- **YES** - Specify the role(s) played.

\* typeset

### Competing Interests

Use the instructions below to enter a competing interest statement for this submission. On behalf of all authors, disclose any [competing interests](#) that could be perceived to bias this work—acknowledging all financial support and any other relevant financial or non-financial competing interests.

This statement **will appear in the published article** if the submission is accepted. Please make sure it is accurate. View published research articles from [PLOS NTDs](#) for specific examples.

The authors have declared that no competing interests exist.

**NO authors have competing interests**

Enter: *The authors have declared that no competing interests exist.*

**Authors with competing interests**

Enter competing interest details beginning with this statement:

*I have read the journal's policy and the authors of this manuscript have the following competing interests: [insert competing interests here]*

\* typeset

This statement is **required** for submission and **will appear in the published article** if the submission is accepted. Please make sure it is accurate and that any funding sources listed in your Funding Information later in the submission form are also declared in your Financial Disclosure statement.

**Data Availability**

Authors are required to make all data underlying the findings described fully available, without restriction, and from the time of publication. PLOS allows rare exceptions to address legal and ethical concerns. See the [PLOS Data Policy](#) and [FAQ](#) for detailed information.

Yes - all data are fully available without restriction

A Data Availability Statement describing where the data can be found is required at submission. Your answers to this question constitute the Data Availability Statement and **will be published in the article**, if accepted.

**Important:** Stating 'data available on request from the author' is not sufficient. If your data are only available upon request, select 'No' for the first question and explain your exceptional situation in the text box.

Do the authors confirm that all data underlying the findings described in their manuscript are fully available without restriction?

**Describe where the data may be found in full sentences. If you are copying our sample text, replace any instances of XXX with the appropriate details.**

- If the data are **held or will be held in a public repository**, include URLs, accession numbers or DOIs. If this information will only be available after acceptance, indicate this by ticking the box below. For example: *All XXX files are available from the XXX database (accession number(s) XXX, XXX).*
- If the data are all contained **within the manuscript and/or Supporting Information files**, enter the following: *All relevant data are within the manuscript and its Supporting Information files.*
- If neither of these applies but you are able to provide **details of access elsewhere**, with or without limitations, please do so. For example:

*Data cannot be shared publicly because*

All relevant data are within the manuscript and its Supporting Information files.

of [XXX]. Data are available from the XXX Institutional Data Access / Ethics Committee (contact via XXX) for researchers who meet the criteria for access to confidential data.

The data underlying the results presented in the study are available from (include the name of the third party and contact information or URL).

- This text is appropriate if the data are owned by a third party and authors do not have permission to share the data.

\* typeset

Additional data availability information:

1 **Title: Factors Associated with In-Hospital Mortality of Adult Tetanus Patients–**  
2 **A Multicenter Study from Bangladesh**

3 **Short title: Factors Associated with Mortality of Adult Tetanus Patients**

4 **Author' name:**

5 **Md. Abdullah Saeed Khan<sup>1</sup>, Mohammad Jahid Hasan<sup>2</sup>, Md Utba Rashid<sup>3</sup>, Soumik Kha**  
6 **Sagar<sup>3</sup>, Sanzida Khan<sup>1</sup>, Susmita Zaman<sup>2</sup>, Sultan Mahamud Sumon<sup>1</sup>, Ariful Basher<sup>1</sup>,**  
7 **Mohammad Delwer Hossain Hawlader<sup>4</sup>, Mohammad Hayatun Nabi<sup>4</sup>, Nadira Sultana**  
8 **Kakoly<sup>4</sup>**

9

10 **Authors' Affiliations**

11

- 12 1. Infectious Disease Hospital, Mohakhali, Dhaka-1212, Bangladesh.
- 13 2. Pi Research Consultancy Center, Dhaka 1211, Bangladesh.
- 14 3. Nutrition and Clinical Services Division (NCSD), International Centre for
- 15 Diarrhoeal Disease Research, Bangladesh (icddr,b), Mohakhali, Dhaka-1212,
- 16 Bangladesh.
- 17 4. Department of Public Health, North South University, Dhaka 1229, Bangladesh.

18

19

20

21

22 **Corresponding Author:**

23 **Md. Abdullah Saeed Khan**

24 MBBS, MPH

25 Medical Officer

26 Infectious Disease Hospital,

27 Mohakhali, Dhaka – 1212, Bangladesh

28 Phone: +8801823210718

29 [abdullahdmc@gmail.com](mailto:abdullahdmc@gmail.com); [abdullah.saeed@northsouth.edu](mailto:abdullah.saeed@northsouth.edu)

30 <https://orcid.org/0000-0002-0707-0437>

31 Mobile no: +8801823210718

32

33

## ABSTRACT

34 **Background:** Tetanus, a vaccine-preventable disease, is still occurring in the elderly  
35 population of low- and middle-income countries with a high case-fatality rate. The  
36 objective of the study was to elucidate the factors associated with in-hospital mortality  
37 of tetanus in Bangladesh.

38 **Methods:** This prospective observational study, conducted in two specialized  
39 infectious disease hospitals, conveniently selected adult tetanus patients ( $\geq 18$  years) for  
40 inclusion. Data were collected through a preformed structured questionnaire. Kaplan  
41 Meier survival analysis and univariate and multivariable Cox regression analysis were  
42 carried out to assess factors associated with in-hospital mortality among patients. All  
43 analysis was done using Stata (version 16) and SPSS (version 26).

44 **Results:** A total of 61 confirmed tetanus cases were included, and the overall in-  
45 hospital mortality rate was 34.4% (n=21). Patients had an average age of  $46.49 \pm 15.65$   
46 years (SD), and the majority were male (96.7%), farmers (57.4%), and came from rural  
47 areas (93.4%). Survival analysis revealed that the probability of death was significantly  
48 higher among patients having an age of  $< 40$  years, incubation time of  $\leq 12$  days, onset  
49 time of  $\leq 4$  days, and having complication(s). However, on multivariable Cox  
50 regression analysis, age (adjusted hazard ratio [aHR] 4.03, 95% Confidence Interval  
51 [CI] 1.07 – 15.17,  $p=0.039$ ) and onset time ( $\leq 4$  days) (aHR 3.33; 95% CI 1.05 – 10.57,  
52  $p=0.041$ ) came as significant predictors of in-hospital mortality after adjusting for  
53 incubation period and complications.



54 **Conclusion:** Older age and short onset time are the two most important determinants  
55 of in-hospital mortality of tetanus patients. Hence, these patients require enhanced  
56 emphasis and care.

57

58 **Keywords:** *Tetanus; In-hospital mortality; Fatality; Risk factors.*

59

#### 60 **Synopsis**

61 The incidence of tetanus decreased considerably from the developed countries through mass  
62 vaccination programs. However, it continues to be a cause of death in low- and middle-income  
63 settings. Tetanus mortality after hospitalization is dependent on many factors. Our study found  
64 that more than one-third of the adult ( $\geq 18$  years) tetanus patients died in the hospitals without  
65 intensive care facilities, and patients' older age, short incubation period (time from injury to the  
66 appearance of symptom), short onset time (interval between the first symptoms and the first  
67 spasm) and development of complications were significantly associated with deaths.  
68 Meticulous and individualized management of adult tetanus patients with one or more of the  
69 above features are required to increase their survival.

70

71

72 **Introduction**

73 Tetanus, an acute and fatal infection, is caused by the neurotoxin-producing bacterium  
74 *Clostridium tetani*. It shows a classical clinical picture of muscular rigidity and  
75 generalized spasms (1). The spores of *C. tetani* are resilient, long-lasting, and  
76 widespread in the environment. It can contaminate wounds, abrasions, and the  
77 umbilical stump in neonates(2). Globally nearly one million people contract tetanus  
78 annually. It has a high case fatality rate, with an estimated 45.5% (95% CI: 43.7%-  
79 47.2%) deaths in African countries(3). However, it might vary based on the availability  
80 and accessibility of intensive care units that are well-equipped. Extensive vaccination  
81 coverage has led to a decline in the number of new cases of tetanus in developed  
82 countries. However, it is still common in low- and middle-income countries. South Asia  
83 and Sub-Saharan Africa account for 82% of tetanus cases worldwide(4). In Bangladesh  
84 the prevalence is still unknown(5).

85 Any unvaccinated person has the potential risk of developing tetanus because of the  
86 absence of immune protection from natural infection. As childhood and maternal  
87 vaccination was started at the end of the twentieth century, tetanus now occurs mainly  
88 among older adults in developed countries. On the other hand, neonatal tetanus, which  
89 occurs primarily due to inadequate or lack of women's immunization, is frequently  
90 found in developing or underdeveloped settings (6). Despite the availability of  
91 inexpensive and effective tetanus vaccines, the disease continues to be a health problem  
92 in impoverished regions of the world (7).

93 *C tetani* spores invade the human body through wounds or minor abrasions under  
94 suitable anaerobic conditions. Whenever a wound occurs, appropriate wound care and  
95 vaccination could prevent tetanus(8). If infection occurs, patients often die in the  
96 hospital due to autonomic failure, cardiovascular dysrhythmia, and complications (9).  
97 Proper management can improve survival among patients(10). However, despite  
98 appropriate management, many patients fail to survive.

99 Death in tetanus is dependent on many factors. The poor prognostic factors of in-  
100 hospital deaths identified are short incubation period, older age, severe type,  
101 generalized variety, dysautonomia, pneumonia, hypoxemia, sepsis, and renal  
102 failure(11). Hence, the treatment of cases often requires assisted ventilation.  
103 Additionally, passive immunization is usually given following trauma or injury (12).  
104 Despite widespread vaccination and advances in management, the mortality in  
105 generalized tetanus is still high. Previously, very few studies prospectively explored the  
106 factors associated with in-hospital mortality among adult tetanus patients. Moreover,  
107 there are few to no studies regarding in-hospital mortality and its associated factors  
108 among adult tetanus patients in Bangladesh. Therefore, this research aimed to analyze  
109 the factors affecting mortality in hospitalized adult tetanus patients.

110

## 111 **Materials and Methods**

### 112 **Study design, population, and settings**

113 This prospective observation was carried out in two specialized infectious disease  
114 hospitals in Bangladesh (Infectious Disease Hospital, Mohakhali, Dhaka, and Surya  
115 Kanto Hospital, Mymensingh), between December 2020 to August 2021. We  
116 approached all adult ( $\geq 18$  years) hospitalized cases of tetanus inclusion. Patients who  
117 were not willing to participate were excluded. A total of 61 clinically diagnosed tetanus  
118 patients were conveniently selected for the study.

### 119 **Study measures**

120 After an extensive review of the published literature, we produced a structured  
121 questionnaire for data collection (Supplementary file 1). The questionnaire had four  
122 parts: a.) sociodemographic information, b.) information regarding tetanus, c.)  
123 comorbidities, investigations, and treatment, d.) in-hospital outcome.

#### 124 *Sociodemographic information*

125 This part queried the patient's age, sex, religion, education, marital status, occupation,  
126 monthly family income, and smoking history.

#### 127 *Information regarding tetanus*

128 This part asked about the mode of injury, place of wound, onset time (duration between  
129 onset of symptoms and full-blown expression), incubation period, clinical features  
130 (including symptoms and signs) at admission, vaccination history (both previous and

131 postexposure), tetanus types, and investigations. The clinical characteristics comprised  
132 of- incubation period (time from injury to the appearance of symptom), time of onset  
133 or onset time (interval between the first symptoms and the first spasm), trismus  
134 (lockjaw), risus sardonicus (a characteristic, abnormal, sustained spasm of the facial  
135 muscles), dysphagia, muscle spasms (other skeletal muscles), spasticity, rigidity  
136 (overall), abdominal rigidity, opisthotonus (spasm of the muscles causing backward  
137 arching of the head, neck, and spine), fever, palpitation, urinary retention and vital  
138 signs.

#### 139 *Comorbidities, investigations, and treatment*

140 Patients' comorbidities, including diabetes mellitus, hypertension, chronic obstructive  
141 pulmonary disease, chronic renal failure, stroke, and ischemic heart disease, were  
142 assessed in this section. Additionally, the information about routine investigations  
143 (hematological profile, serum creatinine, serum calcium, and electrolytes) and  
144 treatment received during the hospital stay was also collected.

#### 145 *In-hospital outcome*

146 Complications and final outcomes of the patients were listed in this section.

#### 147 **Study procedure**

148 At first, informed written consent was taken from the patients or attendants of  
149 unconscious patients at admission for inclusion into this study. Then we recorded  
150 patients' socio-economic data, vaccination history, clinical characteristics, and  
151 comorbidity data upon inclusion. Patients presenting with lockjaw (trismus) or risus

152 sardonicus and one or more features from dysphagia, muscle spasms, abdominal  
153 rigidity, opisthotonos, and history of the wound were considered to have clinically  
154 confirmed tetanus. The presence of an infected wound was considered an essential  
155 diagnostic clue in the absence of trismus or risus sardonicus. After the initial  
156 assessment, patients were followed up during the hospital stay until discharge with  
157 recovery or death. Finally, investigation reports and in-hospital outcome data,  
158 including complications were recorded in the questionnaire.

159

## 160 **Statistical Analysis**

161 After data entry and curation, we performed descriptive and analytic statistics.  
162 Descriptive statistic was expressed as frequency (proportion) for categorical variable  
163 and mean  $\pm$  standard deviation or median (interquartile range) for continuous variable.  
164 Univariate analyses were conducted using the chi-square test, independent samples t  
165 test, Mann-Whitney U test, and Kaplan Meyer Survival analysis. Univariate and  
166 multivariable Cox regression analyses were used for the assessment of significant  
167 factors associated with death. Only statistically significant factors ( $p < 0.05$ ) at univariate  
168 analysis, including age, incubation period, onset time, and presence of complication,  
169 were considered for Cox regression. A p-value of  $\leq 0.05$  was considered significant.  
170 Statistical analysis was performed using statistical software Stata (version 16).

171

## 172 **Ethical Consideration**

173 The study was approved by the Ethical Review Committee of North South University  
174 (2020/OR-NSU/IRB-No.0801). All procedures were conducted following guidelines  
175 laid out by the World Medical Association Declaration of Helsinki. Informed written  
176 consent was obtained from patients or attendants of unconscious patients before their  
177 inclusion in the study.

178

179

180 **Result**

181  prevalence of in-hospital mortality was 34.4% (21 out of 61) in this study. (**Figure**  
182 **1**).

183 **Figure 1. In-hospital mortality of tetanus patients**

184 The average age of all patients was  $46.49 \pm 15.65$  years. The mean age of patients who  
185 died ( $52.10 \pm 12.99$  years) was significantly higher than that of recovered patients  
186 ( $43.55 \pm 16.26$  years,  $p=0.042$ ). Among patients who died, 80.9% were aged  $\geq 40$  years,  
187 and among those who were alive, 55.0% had the same age ( $p=0.045$ ). The majority  
188 patients were male (96.7%), illiterate (46.7%), married (76.7%), farmer (57.4%), had  
189 income  $< 7500$   T (42.6%), and came from rural area (93.4%). The distribution was  
190 statistically similar among patients who were alive and who died (**Table 1**).

191 **Table 1. Sociodemographic characteristics of the patients (n=61)**

| Variable                      | Total<br>n (%)    | Recovered<br>n (%) | Died<br>n (%)     | p-value      |
|-------------------------------|-------------------|--------------------|-------------------|--------------|
| Age (years),<br>mean $\pm$ SD | 46.49 $\pm$ 15.65 | 43.55 $\pm$ 16.26  | 52.10 $\pm$ 12.99 | <b>0.042</b> |
| Age category (years)          |                   |                    |                   |              |
| < 40                          | 22 (36.1)         | 18 (45.0)          | 4 (19.1)          | <b>0.045</b> |
| $\geq 40$                     | 39 (63.9)         | 22 (55.0)          | 17 (80.9)         |              |
| Sex                           |                   |                    |                   |              |



|                       |           |           |            |       |
|-----------------------|-----------|-----------|------------|-------|
| Male                  | 59 (96.7) | 38 (95.0) | 21 (100.0) | 0.297 |
| Female                | 2 (3.28)  | 2 (5.0)   | 0          |       |
| <b>Education</b>      |           |           |            |       |
| Illiterate            | 28 (46.7) | 18 (45.0) | 10 (50.0)  | 0.986 |
| Primary               | 11 (27.5) | 5 (25.0)  | 16 (26.7)  |       |
| SSC                   | 13 (21.7) | 9 (22.5)  | 4 (20.0)   |       |
| HSC and above         | 3 (5.0)   | 2 (5.0)   | 1 (5.0)    |       |
| <b>Marital Status</b> |           |           |            |       |
| Unmarried             | 9 (15.0)  | 6 (15.4)  | 3 (14.3)   | 0.967 |
| Married               | 46 (76.7) | 30 (76.9) | 16 (76.2)  |       |
| Widowed/divorced      | 5 (8.3)   | 3 (7.7)   | 2 (9.5)    |       |
| <b>Occupation</b>     |           |           |            |       |
| Farmer                | 35 (57.4) | 20 (50.0) | 15 (71.4)  | 0.273 |
| Businessman           | 6 (9.8)   | 6 (15.0)  | 0          |       |
| Service holder        | 5 (8.2)   | 3 (7.5)   | 2 (9.5)    |       |
| Carpenter             | 4 (6.7)   | 1 (2.5)   | 3 (14.3)   |       |
| Housewife             | 2 (3.3)   | 2 (5.0)   | 0          |       |
| Student               | 2 (3.3)   | 1 (2.5)   | 1 (4.8)    |       |
| Electrician           | 2 (3.3)   | 2 (5.0)   | 0          |       |
| Retired               | 2 (3.3)   | 2 (5.0)   | 0          |       |
| Tailor                | 1 (1.6)   | 1 (2.5)   | 0          |       |
| Driver                | 1 (1.6)   | 1 (2.5)   | 0          |       |
| Fisherman             | 1 (2.0)   | 1 (1.6)   | 0          |       |
| <b>Income (BDT)</b>   |           |           |            |       |

|                  |           |           |           |       |
|------------------|-----------|-----------|-----------|-------|
| <7500            | 26 (42.6) | 18 (45.0) | 8 (38.1)  | 0.382 |
| 7501 – 10000     | 13 (21.3) | 9 (22.5)  | 4 (19.1)  |       |
| 10001 – 15000    | 16 (26.2) | 11 (27.5) | 5 (23.8)  |       |
| >15000           | 6 (9.8)   | 2 (5.0)   | 4 (19.0)  |       |
| <b>Residence</b> |           |           |           |       |
| Rural            | 57 (93.4) | 39 (97.5) | 18 (85.7) | 0.077 |
| Urban            | 4 (6.56)  | 1 (2.5)   | 3 (14.3)  |       |

192 p-value determined using independent samples t test and Chi-square test where

193 appropriate; Significant p-values were shown in bold face

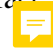

194

195 Of all, 8.2% had at least one comorbidity, 6.7% had hypertension, 4.9% had diabetes  
 196 mellitus, 1.6% had COPD, and 1.6% had ischemic heart disease. Thirty-six percent of  
 197 patients were current smokers, 20% were past smokers, and 44% never smoked (Table  
 198 2).

199 **Table 2. Comorbidity and smoking habit of the patients (n=61)**

| <b>Variable</b>                                  | <b>Total<br/>n (%)</b> | <b>Recovered<br/>n (%)</b> | <b>Died<br/>n (%)</b> | <b>p-value</b> |
|--------------------------------------------------|------------------------|----------------------------|-----------------------|----------------|
| <b>Comorbidity</b>                               |                        |                            |                       |                |
| Present (any)                                    | 5 (8.2)                | 2 (5.0)                    | 3 (14.3)              | 0.209          |
| Absent                                           | 56 (91.8)              | 38 (95.0)                  | 18 (85.7)             |                |
| <b>Diabetes Mellitus</b>                         |                        |                            |                       |                |
| Present                                          | 3 (4.9)                | 1 (2.5)                    | 2 (9.5)               | 0.228          |
| Absent                                           | 58 (95.1)              | 39 (97.5)                  | 19 (90.5)             |                |
| <b>Hypertension</b>                              |                        |                            |                       |                |
| Present                                          | 4 (6.7)                | 1 (2.5)                    | 3 (14.3)              | 0.077          |
| Absent                                           | 57 (93.4)              | 39 (97.5)                  | 18 (85.7)             |                |
| <b>Chronic Obstructive<br/>Pulmonary Disease</b> |                        |                            |                       |                |
| Present                                          | 1 (1.6)                | 0                          | 1 (4.8))              | 0.164          |
| Absent                                           | 60 (98.4)              | 40 (100.0)                 | 20 (95.2)             |                |
| <b>Ischemic heart disease</b>                    |                        |                            |                       |                |
| Yes                                              | 1 (1.6)                | 0                          | 1 (4.8)               | 0.164          |
| No                                               | 60 (98.4)              | 40 (100.0)                 | 20 (95.2)             |                |
| <b>Smoking habit*</b>                            |                        |                            |                       |                |
| Current smoker                                   | 9 (36.0)               | 7 (36.8)                   | 2 (33.3)              | 0.940          |
| Past smoker                                      | 5 (20.0)               | 4 (21.1)                   | 1 (16.7)              |                |
| Never smoker                                     | 11 (44.0)              | 8 (42.1)                   | 3 (50.0)              |                |

200 \*After excluding missing cases

201 p-value determined by Chi-square test

202

203 **Table 3** presents the clinical characteristics of the patients. Only 6.6% of patients  
204 asserted a history of vaccination against tetanus, and 24.6% of patients took  
205 postexposure prophylaxis. The main mode of injury was trauma (95.1%), and the  
206 majority had their wound in the extremities (91.8%). Most of the patients had the  
207 generalized type of tetanus (93.4%) and severe disease (45.9%). These features were  
208 statistically similar between alive and dead patients. The overall median onset time was  
209 3 days (interquartile range [IQR]: 2 – 7). It was statistically similar among patients who  
210 died (2.5, IQR 2- 4) than those who were alive (4, IQR 2 – 10, p=0.076). The median  
211 incubation period was 14 days (IQR 8 – 15) overall. It was also statistically similar  
212 between deceased patients (12, IQR 7 – 15) and alive patients (15, IQR 10 – 16, p  
213 =0.058). However, when categorized at a cutoff point of 12 days, a statistically  
214 significantly higher proportion of dead patients had an incubation period of  $\leq 12$  days  
215 compared to those alive (p=0.043). Of all patients, the majority had severe trismus  
216 (33.9%), mild dysphagia (50%), short spasms (73.5%), and generalized rigidity  
217 (93.4%). Spasticity was present in 75.4% of patients, abdominal rigidity in 68.9%, fever  
218 in 41%, opisthotonus in 9.8%, and urinary retention in 9.8%. Vital signs were within  
219 the normal range. The distribution of the clinical features were statistically similar  
220 between patients who was alive and those who died.

221

222 **Table 3. Clinical characteristics of the patients (n=61)**

223

| <b>Variable</b>                                             | <b>Total<br/>n (%)</b> | <b>Recovered<br/>n (%)</b> | <b>Died<br/>n (%)</b> | <b>p-value</b> |
|-------------------------------------------------------------|------------------------|----------------------------|-----------------------|----------------|
| <b>Prior history of<br/>vaccination against<br/>tetanus</b> |                        |                            |                       |                |
| Present                                                     | 4 (6.6)                | 3 (7.5)                    | 1 (4.8)               | 0.566          |
| Absent                                                      | 19 (31.2)              | 14 (35.0)                  | 5 (23.8)              |                |
| Don't know                                                  | 38 (62.3)              | 23 (57.5)                  | 15 (71.4)             |                |
| <b>Postexposure<br/>prophylaxis</b>                         |                        |                            |                       |                |
| Taken                                                       | 15 (24.6)              | 10 (25.0)                  | 5 (23.8)              | 0.602          |
| Not taken                                                   | 40 (65.6)              | 25 (62.5)                  | 15 (71.4)             |                |
| Don't know                                                  | 6 (9.8)                | 5 (12.5)                   | 1 (4.8)               |                |
| <b>Mode of injury</b>                                       |                        |                            |                       |                |
| Post-traumatic                                              | 58 (95.1)              | 37 (92.5)                  | 21 (100.0)            | 0.209          |
| Postsurgery                                                 | 3 (4.9)                | 3 (7.5)                    | 0                     |                |
| <b>Place of wound</b>                                       |                        |                            |                       |                |
| Extremities                                                 | 56 (91.8)              | 36 (90.0)                  | 20 (95.2)             | 0.479          |
| Head/face                                                   | 5 (8.2)                | 4 (10.0)                   | 1 (4.8)               |                |
| <b>Tetanus type</b>                                         |                        |                            |                       |                |
| Generalized                                                 | 57 (93.4)              | 37 (92.5)                  | 20 (95.2)             | 0.681          |
| Localized                                                   | 4 (6.7)                | 3 (7.5)                    | 1 (4.8)               |                |

|                                                    |                |              |             |              |
|----------------------------------------------------|----------------|--------------|-------------|--------------|
| <b>Time of onset (days),<br/>median (IQR)*</b>     | 3 (2 – 7)      | 4 (2 – 10)   | 2.5 (2 – 4) | 0.076        |
| > 4 days                                           | 20 (36.4)      | 16 (45.7)    | 4 (20.0)    | 0.057        |
| ≤ 4 days                                           | 35 (63.6)      | 19 (54.3)    | 16 (80.0)   |              |
| <b>Incubation period<br/>(days), median (IQR)*</b> | 14 (8 –<br>15) | 15 (10 – 16) | 12 (7 – 15) | 0.058        |
| > 12 days                                          | 28 (52.8)      | 21 (63.6)    | 7 (35.0)    | <b>0.043</b> |
| ≤ 12 days                                          | 25 (47.2)      | 12 (36.4)    | 13 (65.0)   |              |
| <b>Tetanus severity</b>                            |                |              |             |              |
| Mild                                               | 11 (18.0)      | 8 (20.0)     | 3 (14.3)    | 0.871        |
| Moderate                                           | 18 (29.5)      | 12 (30.0)    | 6 (28.6)    |              |
| Severe                                             | 28 (45.9)      | 18 (45.0)    | 10 (47.6)   |              |
| Very severe                                        | 4 (6.6)        | 2 (5.0)      | 2 (9.5)     |              |
| <b>Trismus*</b>                                    |                |              |             |              |
| Absent                                             | 1 (1.7)        | 1 (2.6)      | 0           | 0.677        |
| Mild                                               | 8 (13.6)       | 6 (15.4)     | 2 (10.0)    |              |
| Moderate                                           | 30 (50.8)      | 21 (53.8)    | 9 (45.0)    |              |
| Severe                                             | 20 (33.9)      | 11 (28.2)    | 9 (45.0)    |              |
| <b>Risus sardonicus</b>                            |                |              |             |              |
| Present                                            | 5 (8.2)        | 4 (10.0)     | 1 (4.8)     | 0.479        |
| Absent                                             | 56 (91.8)      | 36 (90.0)    | 20 (95.2)   |              |
| <b>Dysphagia*</b>                                  |                |              |             |              |

|                           |           |           |            |       |
|---------------------------|-----------|-----------|------------|-------|
| Absent                    | 6 (10.7)  | 3 (8.6)   | 3 (14.3)   | 0.378 |
| Mild                      | 28 (50.0) | 20 (57.1) | 8 (38.1)   |       |
| Severe                    | 22 (39.3) | 12 (34.3) | 10 (47.6)  |       |
| <b>Spasms*</b>            |           |           |            |       |
| Short                     | 25 (73.5) | 15 (71.4) | 10 (76.9)  | 0.724 |
| Prolonged                 | 9 (26.5)  | 6 (28.6)  | 3 (23.1)   |       |
| <b>Spasticity</b>         |           |           |            |       |
| Present                   | 46 (75.4) | 31 (77.5) | 15 (71.4)  | 0.601 |
| Absent                    | 15 (24.6) | 9 (22.5)  | 6 (28.6)   |       |
| <b>Rigidity</b>           |           |           |            |       |
| Localized                 | 4 (6.6)   | 3 (7.5)   | 1 (4.8)    | 0.681 |
| Generalized               | 57 (93.4) | 37 (92.5) | 20 (95.2)  |       |
| <b>Abdominal rigidity</b> |           |           |            |       |
| Present                   | 42 (68.9) | 26 (65.0) | 16 (76.2)  | 0.370 |
| Absent                    | 19 (31.2) | 14 (35.0) | 5 (23.8)   |       |
| <b>Opisthotonus</b>       |           |           |            |       |
| Present                   | 6 (9.8)   | 6 (15.0)  | 0          | 0.062 |
| Absent                    | 55 (90.2) | 34 (85.0) | 21 (100.0) |       |
| <b>Fever</b>              |           |           |            |       |
| Present                   | 25 (41.0) | 15 (37.5) | 10 (47.6)  | 0.445 |
| Absent                    | 36 (59.0) | 25 (62.5) | 11 (52.4)  |       |
| <b>Palpitation</b>        |           |           |            |       |

|                                                 |            |            |            |              |
|-------------------------------------------------|------------|------------|------------|--------------|
| Present                                         | 6 (9.8)    | 4 (10.0)   | 2 (9.5)    | 0.953        |
| Absent                                          | 55 (90.2)  | 36 (90.0)  | 19 (90.5)  |              |
| <b>Urinary retention</b>                        |            |            |            |              |
| Present                                         | 6 (9.8)    | 6 (15.0)   | 0          | 0.069        |
| Absent                                          | 55 (90.2)  | 34 (85.0)  | 21 (100.0) |              |
| <b>Pulse (b/min), mean±SD</b>                   | 82.9 ±1.6  | 80.0 ±1.9  | 88.2 ±2.3  | <b>0.011</b> |
| <b>Systolic blood pressure (mmHg), mean±SD</b>  | 111.4 ±1.9 | 109.0 ±2.1 | 115.8 ±3.6 | 0.087        |
| <b>Diastolic blood pressure (mmHg), mean±SD</b> | 73.0 ±1.4  | 73.9 ±1.9  | 71.5 ±1.9  | 0.433        |
| <b>Temperature (F), mean±SD</b>                 | 97.8 ±0.6  | 97.2 ±0.9  | 98.7 ±0.3  | 0.214        |
| <b>Respiratory rate (breaths/min)</b>           | 20 ±0.6    | 19.5 ±0.8  | 20.9 ±0.9  | 0.256        |

224 \*Excluding missing values

225 p-value determined by Mann-Whitney U test, independent samples t test and Chi-

226 square test where appropriate; Significant p-values are shown in boldface.

227

228

229 Hematological profile, random blood sugar, serum creatinine, calcium, and electrolytes

230 were statistically similar between alive and dead patients except for serum sodium



231 which was significantly higher in patients who died (141.9±1.8 mmol/l) than that of  
 232 those who were alive (138.0±0.9 mmol/l, p=0.034). However, the average sodium level  
 233 was within the normal range for both groups of patients (**Table 4**).

234 **Table 4. Investigation profile of participants**

| <b>Variable</b>                                 | <b>Total<br/>Mean ±SD</b> | <b>Recovered<br/>Mean ±SD</b> | <b>Died<br/>Mean ±SD</b> | <b>p-value</b> |
|-------------------------------------------------|---------------------------|-------------------------------|--------------------------|----------------|
| <b>Hemoglobin (g/dl)</b>                        | 12.2 ±0.2                 | 12.2 ±0.3                     | 12.1 ±0.5                | 0.800          |
| <b>RBC (10<sup>9</sup>/mm<sup>3</sup>)</b>      | 4.44 ±0.2                 | 4.3 ±0.2                      | 4.7 ±0.2                 | 0.394          |
| <b>WBC (10<sup>3</sup>/mm<sup>3</sup>)</b>      | 9.9 ±0.5                  | 9.4 ±0.6                      | 10.9 ±0.6                | 0.154          |
| <b>Neutrophil (%)</b>                           | 73.1 ±1.4                 | 71.6 ±1.6                     | 76.9 ±2.5                | 0.091          |
| <b>Lymphocyte (%)</b>                           | 20.8 ±1.3                 | 22.4 ±1.6                     | 17.1 ±2.2                | 0.065          |
| <b>Platelet (10<sup>6</sup>/mm<sup>3</sup>)</b> | 237.6 ±12.8               | 240.9 ±16.5                   | 229.5 ±19.1              | 0.694          |
| <b>ESR (mm)</b>                                 | 22.8 ±1.7                 | 22.7 ±2.2                     | 23.4 ±2.6                | 0.853          |
| <b>RBS (mmol/l)</b>                             | 7.1 ±0.5                  | 7.3 ±0.7                      | 6.8 ±0.3                 | 0.604          |
| <b>Serum calcium (mg/dl)</b>                    | 7.9 ±0.03                 | 7.9 ±0.05                     | 7.9 ±0.03                | 0.765          |
| <b>Serum creatinine (mg/dl)</b>                 | 1.2 ±0.1                  | 1.2 ±0.1                      | 1.2 ±0.1                 | 0.948          |
| <b>Serum electrolyte<br/>(mmol/l)</b>           |                           |                               |                          |                |
| <b>Sodium</b>                                   | 139.3 ±0.9                | 138.0 ±0.9                    | 141.9 ±1.8               | 0.034          |
| <b>Potassium</b>                                | 4.4 ±0.7                  | 3.7 ±0.1                      | 5.6 ±1.8                 | 0.178          |
| <b>Chloride</b>                                 | 107.5 ±1.02               | 106.2 ±1.1                    | 109.8 ±1.9               | 0.095          |

235

236 RBC: Red blood cell; WBC: White blood cell

237 p-value determined by independent samples t test; Significant p-values were shown in

238 bold font

239

240 Out of 61 patients, 26 (42.6%) developed at least one complication, and this proportion

241 was significantly higher in dead patients (61.9%) compared to that of alive patients

242 (32.5%,  $p=0.027$ ). The most common complication was hypoxemia (31.1%) followed

243 by aspiration pneumonia (19.6%), bedsore (13.1%), dysautonomia (6.5%), DVT

244 (4.9%), UTI (3.28%), sepsis (1.6%), thrombophlebitis (1.6%), and wound infection

245 (1.6%). The individual distribution of the complications was statistically similar

246 between the alive and dead patient groups (**Table 5**).

247 **Table 5. List of complications among patients (n=61)**

| <b>Variable</b>         | <b>Total<br/>n (%)</b> | <b>Recovered<br/>n (%)</b> | <b>Died<br/>n (%)</b> | <b>p-value</b> |
|-------------------------|------------------------|----------------------------|-----------------------|----------------|
| <b>Any complication</b> |                        |                            |                       |                |
| Present                 | 26 (42.6)              | 13 (32.5)                  | 13 (61.9)             | <b>0.027</b>   |
| Absent                  | 35 (57.4)              | 27 (67.5)                  | 8 (38.1)              |                |
| <b>Hypoxemia</b>        |                        |                            |                       |                |
| Present                 | 19 (31.1)              | 6 (15.0)                   | 13 (61.9)             | 0.164          |
| Absent                  | 42 (68.9)              | 34 (85.0)                  | 8 (38.1)              |                |

|                             |           |            |            |       |
|-----------------------------|-----------|------------|------------|-------|
| <b>Aspiration Pneumonia</b> |           |            |            |       |
| Present                     | 12 (19.6) | 5 (12.5)   | 7 (33.3)   | 0.05  |
| Absent                      | 57 (93.4) | 39 (97.5)  | 18 (85.7)  |       |
| <b>Bedsore</b>              |           |            |            |       |
| Present                     | 8 (13.1)  | 7 (17.5)   | 1 (4.8)    | 0.161 |
| Absent                      | 53 (86.9) | 33 (82.5)  | 20 (95.2)  |       |
| <b>Dysautonomia</b>         |           |            |            |       |
| Present                     | 4 (6.5)   | 2 (5.0)    | 2 (9.5)    | 0.498 |
| Absent                      | 57 (93.4) | 38 (95.0)  | 19 (90.5)  |       |
| <b>DVT</b>                  |           |            |            |       |
| Present                     | 3 (4.9)   | 1 (2.5)    | 2 (9.5)    | 0.228 |
| Absent                      | 58 (95.1) | 39 (97.5)  | 19 (90.5)  |       |
| <b>UTI</b>                  |           |            |            |       |
| Present                     | 2 (3.2)   | 2 (5.0)    | 0          | 0.297 |
| Absent                      | 59 (96.7) | 38 (95.0)  | 21 (100.0) |       |
| <b>Sepsis</b>               |           |            |            |       |
| Present                     | 1 (1.6)   | 1 (2.5)    | 0          | 0.465 |
| Absent                      | 60 (98.4) | 39 (97.5)  | 21 (100.0) |       |
| <b>Thrombophlebitis</b>     |           |            |            |       |
| Present                     | 1 (1.6)   | 0          | 1 (4.8)    | 0.164 |
| Absent                      | 60 (98.4) | 40 (100.0) | 20 (95.2)  |       |
| <b>Wound infection</b>      |           |            |            |       |

|         |           |           |            |       |
|---------|-----------|-----------|------------|-------|
| Present | 1 (1.6)   | 1 (2.5)   | 0          | 0.465 |
| Absent  | 60 (98.4) | 39 (97.5) | 21 (100.0) |       |

248 p-value determined by Chi-square test; Significant p-values are shown in bold face;

249 DVT: Deep Vein Thrombosis; UTI: Urinary Tract Infection.

250

251 The median duration of hospital stay of the patients was 11 days (IQR: 6 – 21 days)  
 252 (**Figure 2**). Recovered patients had a significantly longer duration of stay (median 17  
 253 days; IQR: 10 – 23 days) than those who died (median 5 days; IQR: 2 – 8 days)  
 254 ( $p < 0.001$ ).

255

256 **Figure 2. Boxplots showing the duration of hospital stay among tetanus patients**  
 257 **categorized by outcome**

258

259 Kaplan-Meier survival analysis showed that the probability of survival among tetanus  
 260 patients at 40 days after admission was 0.6, and it was statistically significantly better  
 261 among patients with an age of  $< 40$  years, incubation time of  $\leq 12$  days, onset time of  
 262  $\leq 4$  days and no complications (**Figure 3**).

263

264 **Figure 3. Kaplan-Meier survival curves showing the probability of overall**  
 265 **survival and survival across different groups of tetanus patients**

266

267 Only factors that were significant ( $p < 0.05$ ) in Kaplan-Meier survival analysis were  
268 considered for univariate and multivariable Cox regression models to determine their  
269 associations with the in-hospital mortality of tetanus patients (Table 6). After adjusting  
270 for incubation period and complications, only age ( $\geq 40$  years) and onset time ( $\leq 4$  days)  
271 were found to be significant predictors of tetanus case-fatality in the hospital. Tetanus  
272 patients aged  $\geq 40$  years were 4.03 times (95% CI 1.07 – 15.17,  $p = 0.039$ ) more likely to  
273 die due to tetanus than those aged  $< 40$  years. Patients with an onset time of  $\leq 4$  days were  
274 significantly more likely (aHR 3.33; 95% CI 1.05 – 10.57,  $p = 0.041$ ) to die in the hospital  
275 than those with a higher onset time.

276 **Table 6. Univariate and multivariable Cox regression analysis for factors**  
277 **associated with in-hospital mortality among tetanus patients**

| Factors                             | Reference Category | Crude HR (95%CI)   | p-value | Adjusted HR (95%CI) | p-value      |
|-------------------------------------|--------------------|--------------------|---------|---------------------|--------------|
| Age group ( $\geq 40$ years)        | $< 40$ years       | 2.98 (0.99 – 9.02) | 0.053   | 4.03 (1.07 – 15.17) | <b>0.039</b> |
| Incubation period ( $\leq 12$ days) | $> 12$ days        | 2.57 (0.96 – 6.85) | 0.059   | 2.49 (0.90 – 6.90)  | 0.078        |
| Onset time ( $\leq 4$ days)         | $> 4$ days         | 2.94 (0.97 – 8.97) | 0.058   | 3.33 (1.05 – 10.57) | <b>0.041</b> |

|                           |        |                    |              |                    |       |
|---------------------------|--------|--------------------|--------------|--------------------|-------|
| Complication<br>(Present) | Absent | 2.79 (1.06 – 7.34) | <b>0.038</b> | 2.09 (0.72 – 6.07) | 0.175 |
|---------------------------|--------|--------------------|--------------|--------------------|-------|

278 HR: Hazard ratio; Significant p-values are shown in boldface.

279

## 280 Discussion

281 Tetanus is a vaccine-preventable disease that is still continuing to infect people,  
 282 particularly, in low-income and middle-income countries. As the spore of the causative  
 283 organism *C. tetani* remains widespread in the environment, its eradication is  
 284 impossible. On the other hand, life-long immunity against tetanus requires three booster  
 285 doses of vaccine during the adolescent years (13). Currently, only women of  
 286 childbearing age are targeted through booster vaccination programs, which have  
 287 substantially reduced maternal and neonatal tetanus in many countries. However, it  
 288 remains a problem for adults in South Asia and Sub-Saharan Africa. The Global  
 289 Disease Burden (GBD) studies suggested that, as of 2017, approximately 82% of all  
 290 tetanus cases in the world were comprised of patients from these two regions, along  
 291 with 77% of the total 38,000 tetanus deaths (4). Hence, it was pertinent to study the  
 292 factors associated with mortality among patients who are already infected. This study  
 293 is one of the few attempts in Bangladesh to explore the factors associated with in-  
 294 hospital mortality of adult tetanus patients.

295 We found that nearly 34.4% of patients died in the hospital. This is higher than two  
 296 previous studies from Bangladesh, where authors reported 22.5%(14) and 28.6%(5)  
 297 deaths. However, the observed death rates show regional variations. For instance,

298 Tanon et al. reported a death rate of 30% in the Ivory Coast (15), and Marulappa et al.  
299 found it to be 42.2% in India(16). The case-fatality rates appear to be considerably  
300 lower where patients were provided ventilatory support. This can be seen in China (17)  
301 and Nepal (18), where only 5.9% and 7.5% of deaths were reported, respectively.  
302 However, despite giving mechanical ventilation, the death rate was 43.1% in  
303 Tanzania(19), a lower-middle-income country, which raises the importance of overall  
304 management facilities as well as other factors associated with deaths among tetanus  
305 patients.

306 We noted that patients who died had a significantly higher mean age than those who  
307 were alive, and patients with age  $\geq 40$  years had an increased chance of death in the  
308 hospital. This finding is supported by previous observations in Bangladesh(5),  
309 Tanzania(19), and India(16). Similar to ours, Chalya et al. (19) noted that patients aged  
310  $\geq 40$  years were significantly more likely to die when adjusted for other factors, such as  
311 incubation period, onset time, presence of complications, prior immunization, and  
312 tetanus severity.

313 The male population constituted the maximum number of participants in our study as  
314 well as other studies reporting on tetanus cases(7,14–19). This probably reflects the  
315 outcome of immunization strategies for women of childbearing age in all countries. The  
316 WHO recommends three booster dosages of vaccine at ages: 12 – 23 months, 4 – 7  
317 years, and 9 – 15 years for achieving life-long immunity for all (13). Although many  
318 countries have programs for childhood immunization, expanding those to include

319 booster dosages remains challenging. Hence, the vulnerable male population should be  
320 identified and vaccinated to protect them from tetanus ~~as a starter~~.

321 One important finding of our study is that more than half of the patients were farmers  
322 and lived in rural areas. Similarly, many previous studies(16,19–22) observed a high  
323 proportion of farmers among tetanus patients. As *C. tetani* spores remain in the  
324 environment, people working in the fields, often with sharp cutting instruments, have a  
325 higher chance of being exposed to the bacteria due to accidental punctures or lacerated  
326 wounds. Farmers or agriculturists in low- and middle-income countries often work  
327 barefooted without adequate personal protective measures in the fields(23). Therefore,  
328 they could be treated as a high-risk group to prioritize primary and booster  
329 immunization wherever appropriate.

330 We found that only 6.6% of patients could remember taking tetanus vaccine in the past  
331 and only one-quarter of patients took postexposure prophylaxis. Similar observations  
332 were reported by Khakheli et al. (22) and Tosun et al. (6). Patients tend to forget the  
333 previous history of vaccination, and their attendants are even less likely to know about  
334 their vaccination history, which explains the reports. However, a low frequency of post-  
335 exposure prophylaxis indicates a lack of knowledge, awareness, and practice regarding  
336 tetanus vaccination after injury, particularly minor injuries, among the general  
337 population. Health authorities should work to address this issue where tetanus is not  
338 uncommon.

339 Although an onset time (duration between onset of symptoms to full-blown  
340 presentation) of 48 hours (2 days) and incubation of period of 7 days is used as a cutoff



341 point of determining the increased risk of fatality in the majority of studies exploring  
342 prognostic factors of tetanus(2), we selected a higher cutoff point for both because the  
343 median onset time and incubation period were high among our study participants. Our  
344 analysis revealed that an onset time of  $\leq 4$  days and an incubation period of  $\leq 12$  days  
345 significantly increased the chance of fatality of tetanus patients in the hospital.  
346 However, after adjustment for age and the presence of complications, only onset time  
347 ( $\leq 4$  days) remained a significant determinant of in-hospital mortality. Previously,  
348 Amare et al. (11) reported a univariate association of  $< 3$  days onset time with mortality,  
349 which became statistically nonsignificant after multivariate logistic adjustments.  
350 Similarly, Krishnan et al. (12) and Chalya et al. (19) didn't find any association of onset  
351 time ( $\leq 48$  hours) with the death of tetanus patients. The incubation period of  $< 7$  days  
352 was found to be associated with a significantly increased risk of mortality in ~~several~~  
353 previous reports(19,22). In contrast, some other reports did not find such an  
354 association(7,11). However, very few studies have considered a higher incubation  
355 period cutoff point for analysis, making it difficult to comment on the findings.  
356 Additionally, differences in sample size and consideration of other factors during  
357 multivariate adjustment as well as the type of analysis used, often influence the  
358 outcome. Hence, the findings should be read in the context of a particular study.

359 The clinical presentation of tetanus shows variability in previous studies. The most  
360 common symptoms among our patients included lockjaw (trismus), dysphagia, and  
361 spasticity like previous observations in Bangladesh(5,14). We did not find any  
362 noticeable differences in clinical features between alive and dead tetanus patients.  
363 Neither did we find any remarkable differences in routine investigations of dead and

364 alive patients. Serum sodium levels were slightly but statistically significantly higher  
365 in deceased patients than that of recovered ones. However, both groups had their values  
366 within the normal limit. Therefore, the difference discovered could be a random finding  
367 that needs to be evaluated through further large sample studies.

368 Unlike Chalya et al. (19), we did not find an increased risk of mortality in patients with  
369 severe tetanus. But our finding is concordant with that of Amare et al. (11). However,  
370 it might depend on the scales used for severity grading among patients. The Ablett  
371 classification scheme used in our study is dependent on the presence of spasms and  
372 autonomic disturbance, which evolve throughout the course of the disease (2). Hence it  
373 is considered to be less suitable for prognostic stratification. Nevertheless, similar to  
374 other studies(22), we noted that nearly 50% of patients presented with severe and very  
375 severe disease.

376 In the present study, only 8.2% of participants had one or more comorbidities from  
377 diabetes, hypertension, COPD, and ischemic heart disease. However, it was not  
378 associated with a higher risk of mortality. Rather, the development of complication(s)  
379 was associated with a significantly higher risk of death in the hospital, which is  
380 concordant with findings from Marulappa et al. (16), Tanon et al. (15), Krishnan et al.  
381 (12), and Bankole et al. (20). Hypoxemia and aspiration pneumonia were frequent  
382 complications that we encountered in our patients. Hypoxemia is the consequence of  
383 laryngeal spasms, respiratory distress, and respiratory failure that might occur in tetanus  
384 patients(12). Unlike Amare et al. (11), who reported the occurrence of dysautonomia in  
385 91.7% of deceased tetanus patients, we found the problem in only 9.5% of patients who

386 died. This could be explained by the lack of cardiac monitoring facilities and intensive  
387 care units in our centers, the presence of which would have allowed close monitoring  
388 and precise detection of autonomic imbalance in these patients. Moreover, life-saving  
389 ventilatory supports for patients were not possible either because of the lack of  
390 facilities.

### 391 **Limitations**

392 Our study had several limitations. The sample size was small.. The impact of ventilatory  
393 support on mortality could not be evaluated due to a lack of facilities. Further follow-  
394 up of patients after discharge from the hospital was also not possible. However, this  
395 was one of the few attempts to assess the clinical-epidemiological profile and factors  
396 associated with in-hospital mortality among tetanus patients in Bangladesh. Our  
397 findings would undoubtedly spark interest in further studies and inform policymakers  
398 regarding the limitations in the management of tetanus that need to be addressed.

### 399 **Recommendations**

400 Considering the findings of this study, we have the following recommendations-

- 401 1. Adult tetanus patients with a higher age should be given special care during  
402 management.
- 403 2. A shorter onset time of tetanus must warrant careful assessment of disease  
404 severity for meticulous treatment.
- 405 3. A booster vaccination program should be started prioritizing vulnerable male  
406 population to prevent tetanus incidence in the country.

407 4. Further large-scale countrywide studies on tetanus patients should be carried out  
408 to explore management strategies and reduce case-fatality among tetanus  
409 patients.

410 **Conclusion**

411 Although expanded programs on immunization and maternal and neonatal tetanus  
412 elimination programs have been successful in the considerable reduction of tetanus in  
413 neonates, children, women of childbearing age, and men at their early adulthood, older  
414 adult men are still vulnerable to tetanus in Bangladesh. As most of the cases come from  
415 rural areas where farming and manual work are the principal modes of earning, they  
416 could be considered a priority group for a booster vaccination program. On the other  
417 hand, tetanus patients with higher age and shorter onset time needs special care during  
418 management as they have a higher risk of death.

419

420 **Authors Declaration**

421 **Declaration of Competing Interest:** The authors declare that there are no conflicts of  
422 interest.

423 **Authors Contribution:**

424 The conception of the study was generated by MASK. A detailed outline and design of  
425 the study was prepared by MASK, MJH, SZ, SMS, AB, MDHH MHN and NSK. Data  
426 collection, data acquisition and associated works were performed by MASK, SK, MUR,  
427 and SKS. Data analysis was carried out by MASK. The first draft of the manuscript was  
428 prepared by MASK. MASK, MJH, MUR, SKS, SK, SZ, SMS, AB, MDHH, MHN,  
429 NSK, reviewed the draft and approved the final version.

430

431 **Data available:** Available upon reasonable request from the corresponding authors.

432 **Funding:** No funding was received for this study.

433 **Acknowledgement:** Authors acknowledge the contribution of the patients and their  
434 guardians for their kind consent to participate in the study.

435

436

## Reference:

1. Bennett JE, Dolin R, Blaser MJ. Infectious Disease Essentials. Philadelphia: Elsevier; 2017.
2. Yen LM, Thwaites CL. Tetanus. *Lancet*. 2019;393(10181):1657–68.
3. Woldeamanuel YW, Andemeskel AT, Kyei K, Woldeamanuel MW, Woldeamanuel W. Case fatality of adult tetanus in Africa: Systematic review and meta-analysis. *J Neurol Sci*. 2016;368:292–9.
4. Yen L, Thwaites C, Behrens H, Ochmann S, Danoaite B, Roser M. Tetanus [Internet]. OurWorldInData.org. 2019. p. 1657–68. Available from: <https://ourworldindata.org/tetanus>
5. Hasnain MG, Maruf S, Nath P, Anuwarul A, Ahmed MNU, Chowdhury IH, et al. Managing severe tetanus without ventilation support in a resource-limited setting in Bangladesh. *Am J Trop Med Hyg*. 2018;99(5):1234–8.
6. Tosun S, Batirel A, Oluk AI, Aksoy F, Puca E, Bénézit F, et al. Tetanus in adults: results of the multicenter ID-IRI study. *Eur J Clin Microbiol Infect Dis*. 2017;36(8):1455–62.
7. Saltoglu N, Tasova Y, Midikli D, Burgut R, Dünder IH. Prognostic factors affecting deaths from adult tetanus. *Clin Microbiol Infect*. 2004;10(3):229–33.
8. Erdem H, Inan A, Altindis S, Carevic B, Askarian M, Cottle L, et al. Surveillance, control and management of infections in intensive care units in Southern Europe, Turkey and Iran - A prospective multicenter point prevalence

- study. *J Infect.* 2014;68(2):131–40.
9. Lisboa T, Ho Y-L, Henriques Filho GT, Brauner JS, Valiatti JLDS, Verdeal JC, et al. Guidelines for the management of accidental tetanus in adult patients. *Rev Bras Ter intensiva.* 2011;23(4):394–409.
  10. Ajose FOA, Odusanya OO. Survival from adult tetanus in Lagos, Nigeria. *Trop Doct.* 2009;39(1):39–40.
  11. Amare A, Melkamu Y, Mekonnen D. Tetanus in adults: Clinical presentation, treatment and predictors of mortality in a tertiary hospital in Ethiopia. *J Neurol Sci.* 2012;317(1–2):62–5.
  12. Khrisnan L, Anam, Panigoro R. Factors Affecting Mortality in Adult Tetanus Patients. *Althea Med J.* 2015;2(2):157–62.
  13. World Health Organization. Protecting all against tetanus. Vol. 92. 2017. 1–6 p.
  14. Feroz A, Rahman M. A Ten-year Retrospective Study of Tetanus at a Teaching Hospital in Bangladesh. *J Bangladesh Coll Physicians Surg.* 2007;25(2).
  15. Tanon AK, Doumbia A, Coffie PA. Current Prognostic Factors of Tetanus in Abidjan: 2005-2014. *J Microbiol Infect Dis.* 2017;7(June):125–31.
  16. Marulappa VG, Manjunath R, Mahesh N, Maligegowda L. A ten year retrospective study on adult Tetanus at the epidemic disease (ED) hospital, Mysore in Southern India: A review of 512 cases. *J Clin Diagnostic Res.* 2012;6(8):1377–80.



17. Fan Z, Zhao Y, Wang S, Zhang F, Zhuang C. Clinical features and outcomes of tetanus: A retrospective study. *Infect Drug Resist.* 2019;12:1289–93.
18. Shah B, Subedi M, Bartaula B, Ghimire A. Retrospective chart- review of Tetanus cases admitted in a tertiary care hospital. *J Adv Intern Med.* 2020;9(2):69–72.
19. Chalya PL, Mabula JB, Dass RM, Mbelenge N, Mshana SE, Gilyoma JM. Ten-year experiences with Tetanus at a Tertiary hospital in Northwestern Tanzania: A retrospective review of 102 cases. *World J Emerg Surg.* 2011;6(1):2–9.
20. Bankole IA, Danesi MA, Ojo OO, Okubadejo NU, Ojini FI. Characteristics and outcome of tetanus in adolescent and adult patients admitted to the Lagos University Teaching Hospital between 2000 and 2009. *J Neurol Sci.* 2012;323(1–2):201–4.
21. Ramachandra L, Shobha K, Kannan PA. A Retrospective Clinical Study of Factors Affecting Tetanus. *internet J Microbiol.* 2008;7(1):1–6.
22. Khakheli MS, Khuhro BA, Jamali AH. Tetanus: Still a killer in adults. *Anaesthesia, Pain Intensive Care.* 2013;17(2):149–53.
23. Öncü SS, Önde M, Öncü SS, Ergin F, Öztürk B. Tetanus seroepidemiology and factors influencing immunity status among farmers of advanced age. *Health Policy (New York).* 2011;100(2–3):305–9.

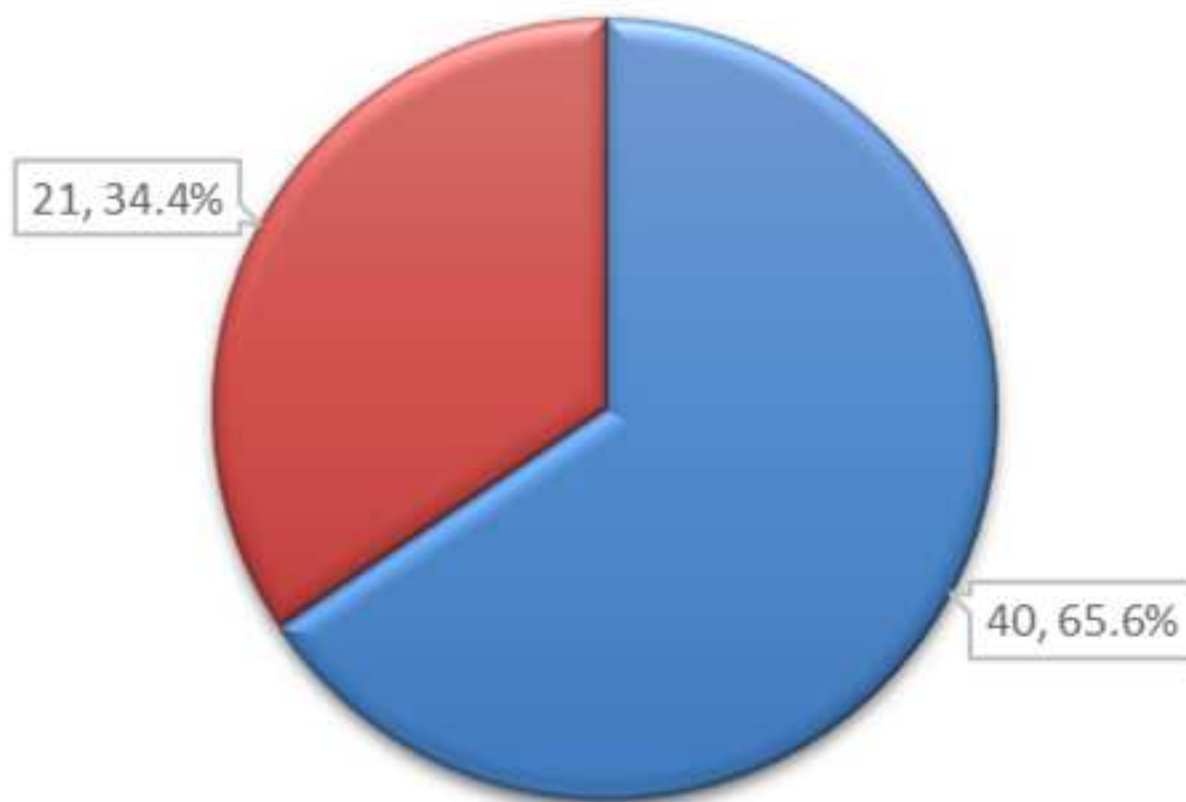

Recovered Died

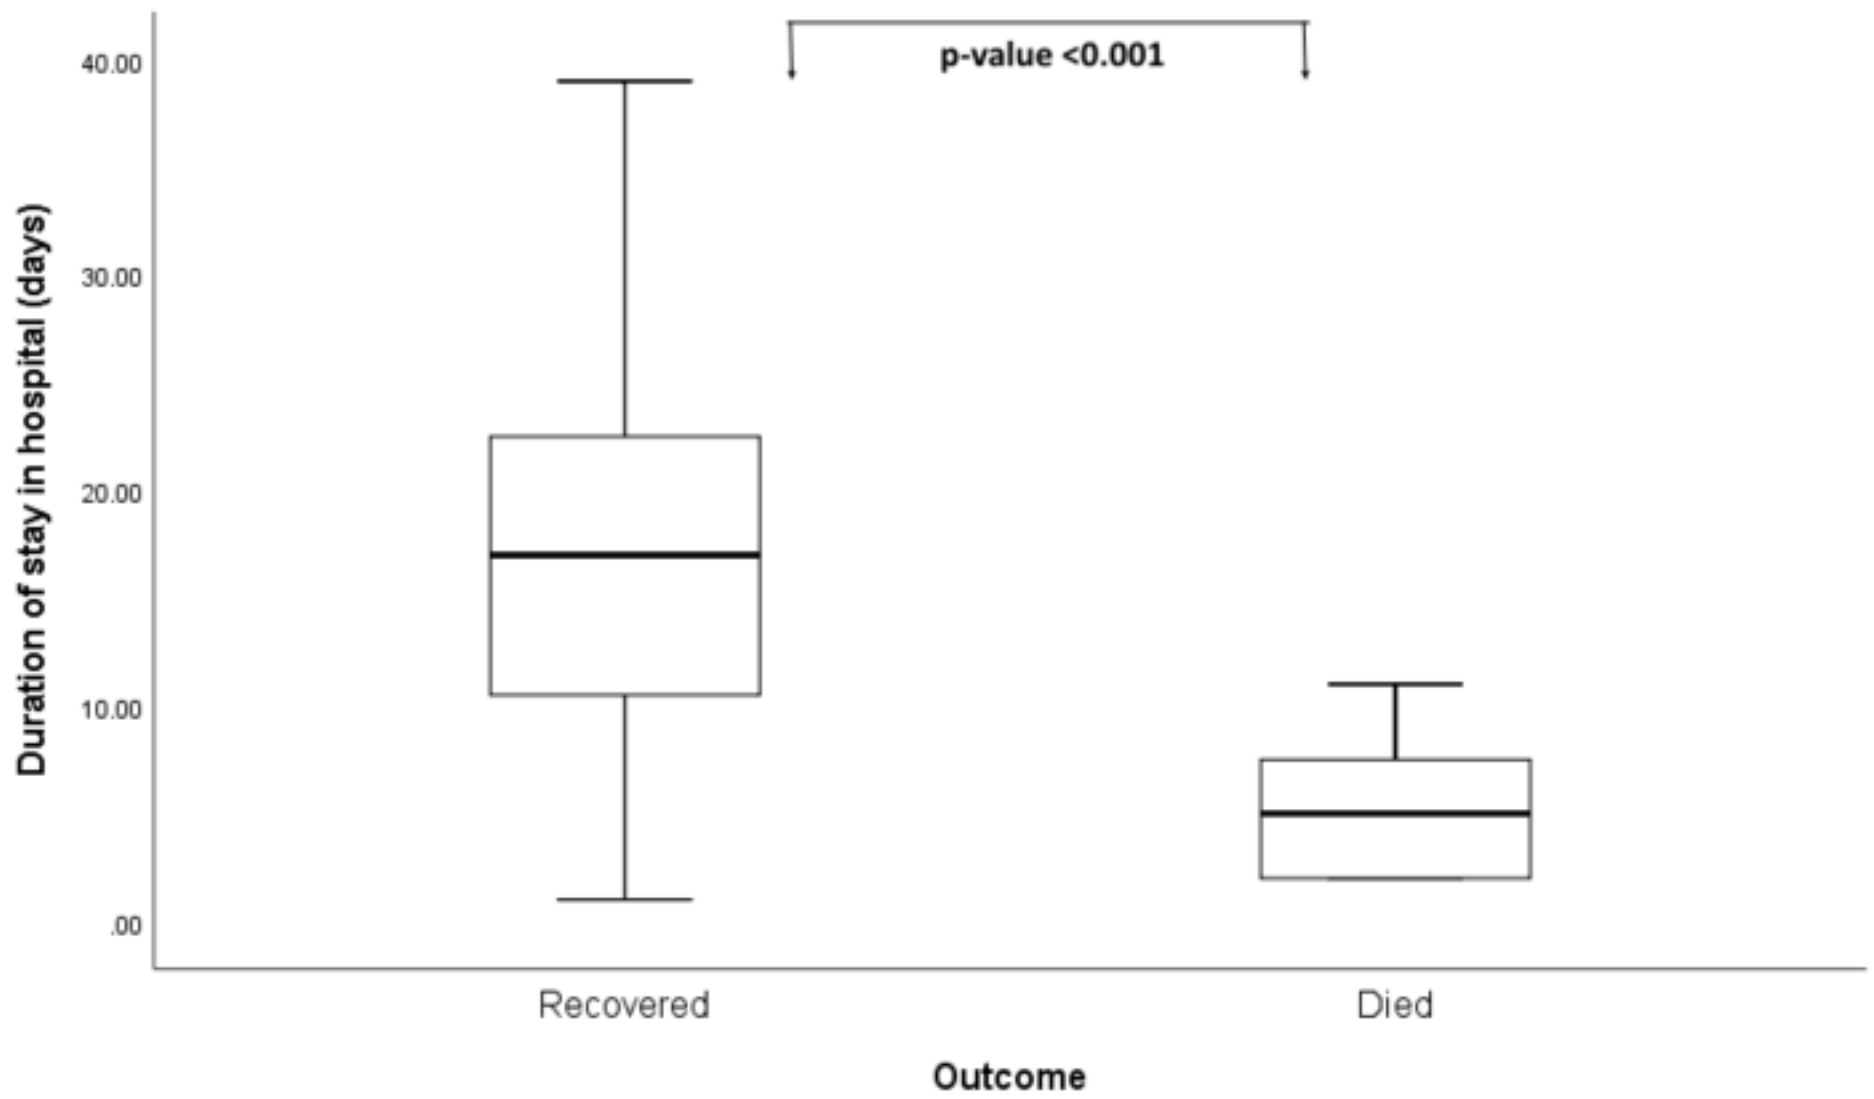

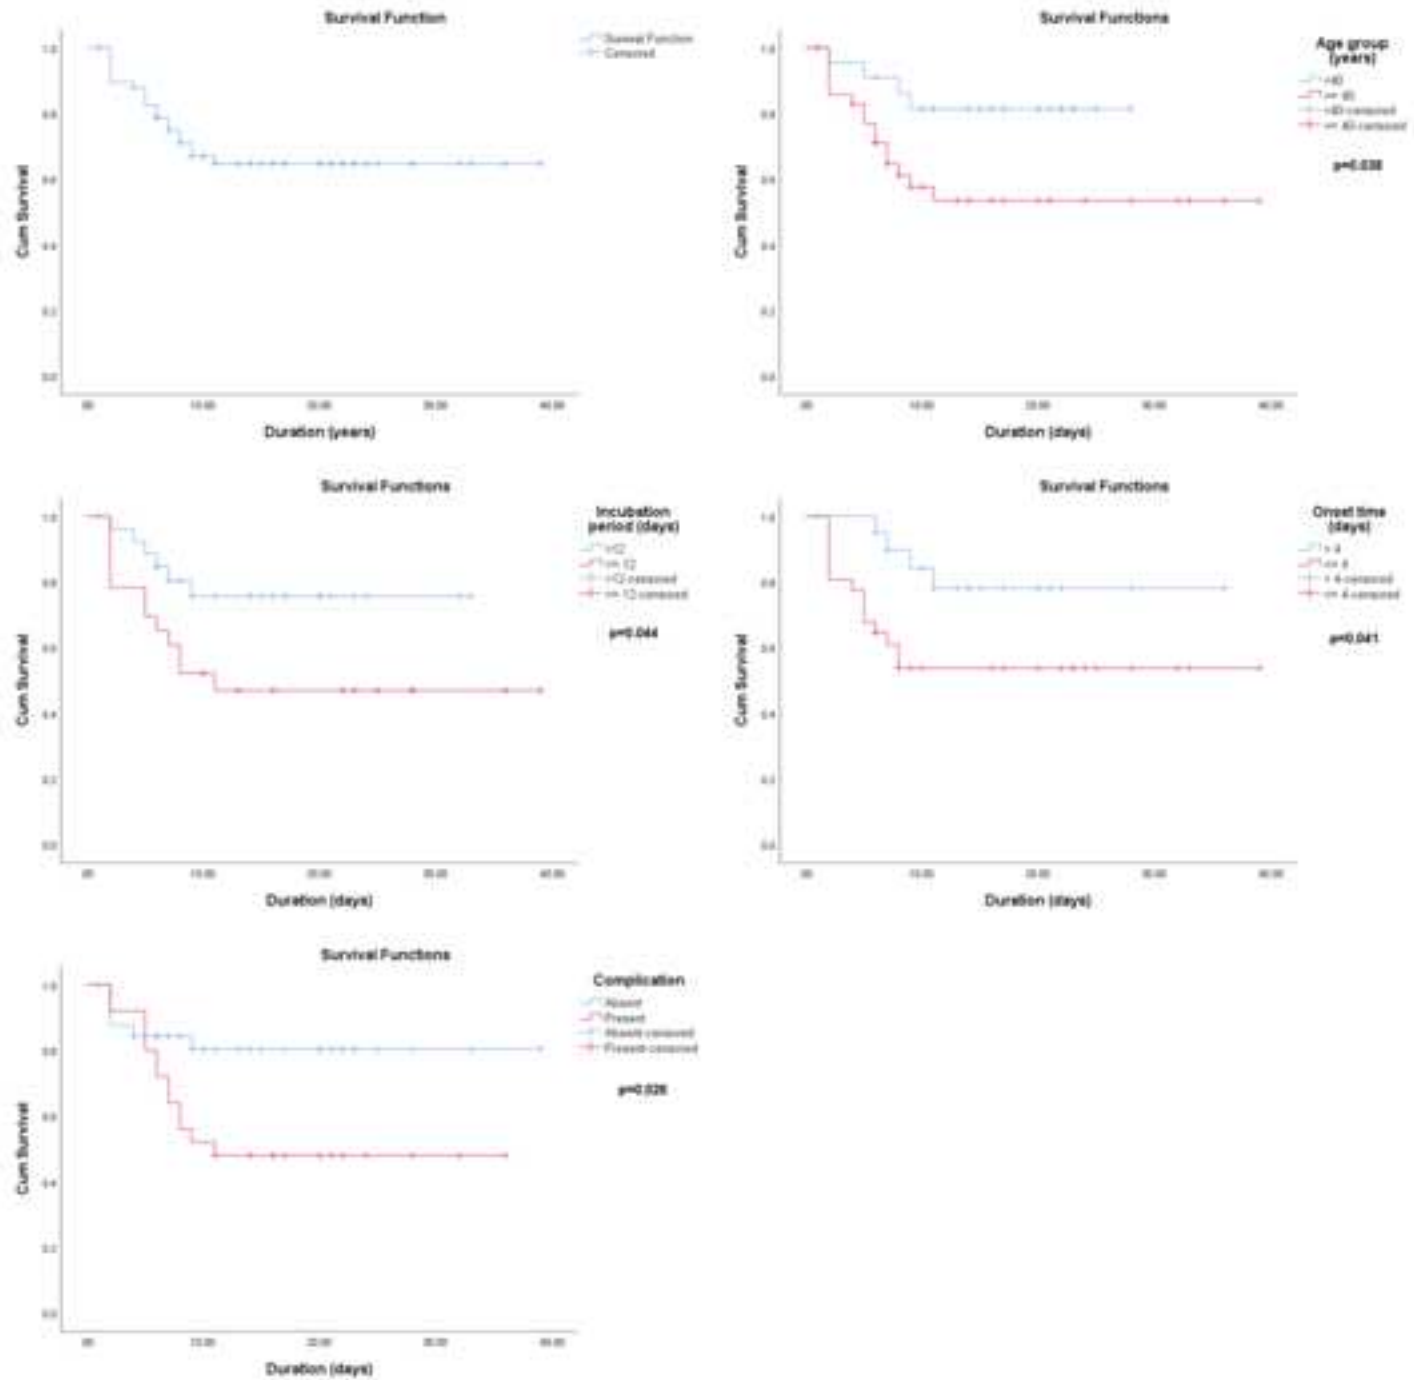

Supplement: pntd.0010235.s004.pdf [file pntd.0010235.s004.pdf]
